# Supplementary material
Source: PubMed Central journal article supplement (PMC2683087)
Supplement: 0812062106_0812062106SI.pdf [file 0812062106_0812062106SI.pdf]

# Supporting Information

Lachize et al. 10.1073/pnas.0812062106

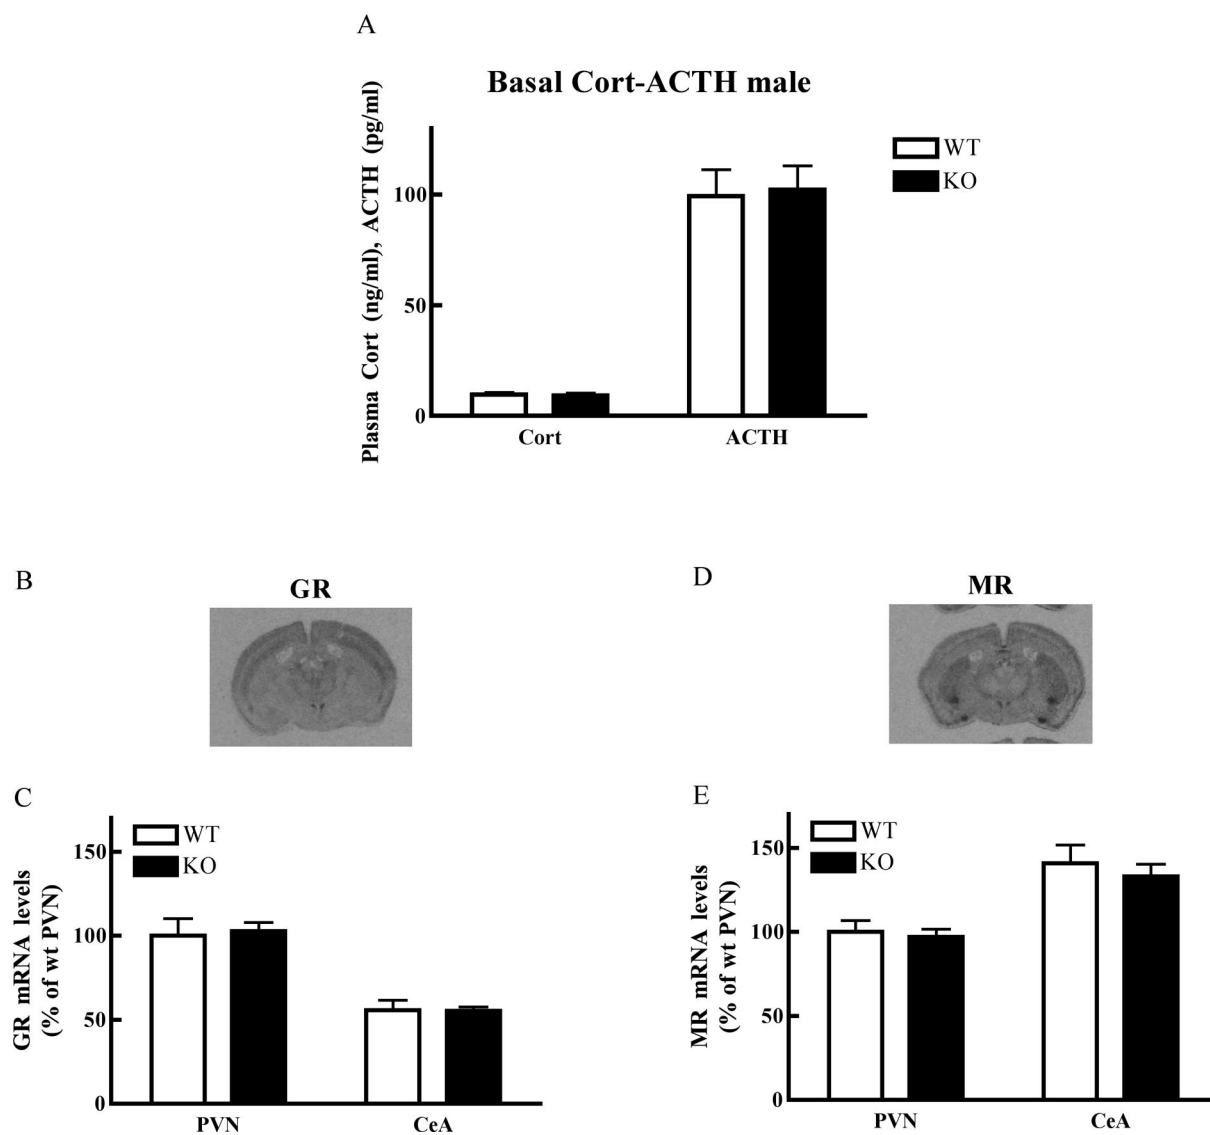

**Fig. S1.** Basal HPA axis measures do not differ between SRC-1 knockout mice and wild type controls. (A) Basal plasma corticosterone and ACTH. (B) Representative section of GR mRNA in situ hybridization. (C) GR mRNA levels in PVN and CeA as measured from autoradiographs. (D) Representative section of MR mRNA in situ hybridization. (E) MR mRNA levels in PVN and CeA as measured from autoradiographs.

## Cort after Dexamethasone

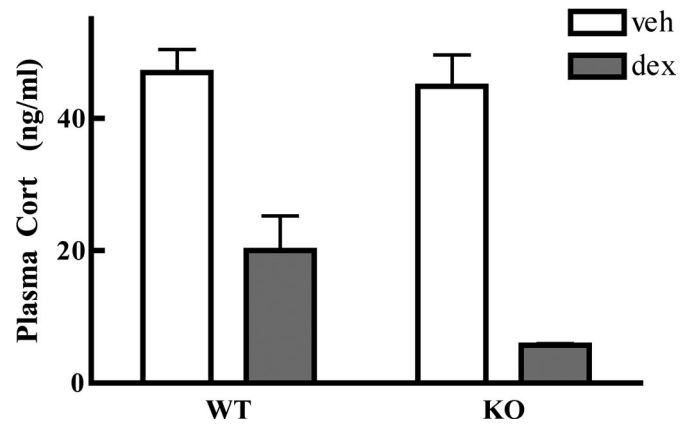

**Fig. S2.** Plasma corticosterone after 5 days of dexamethasone treatment is suppressed at least as well in SRC-1 knockouts as it is in wild type mice. Two way ANOVA indicated a highly significant effect of treatment ( $F_{1,17} = 60.06$ ;  $P < 0.0001$ ) but no genotype or interaction effect.

### 30' restraint

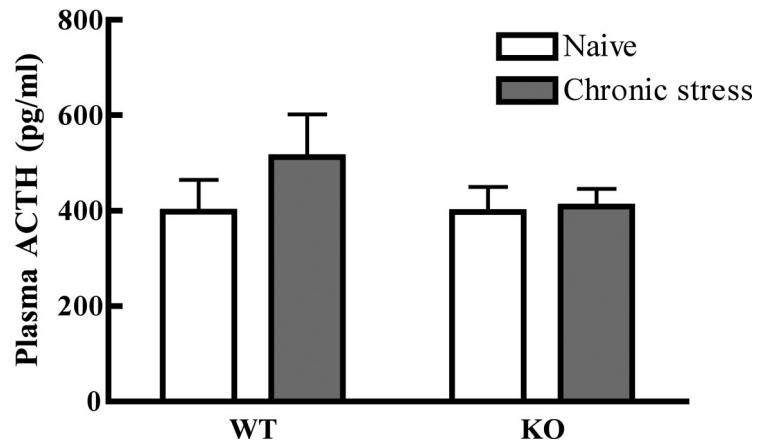

**Fig. S3.** Trunk blood ACTH levels 30 min after the onset of restraint. Although there is a hint toward facilitation to the heterotypic stressor in wild type, but not in knockout mice, there is clearly no statistical significance for an effect of genotype or stress history (two-way ANOVA: all  $P$  values  $> 0.38$ ).
